# Supplementary material
Source: MDPI journal article supplement (https://www.mdpi.com/2077-0472/13/12/2262)
Supplement: s1 [file s1]

**Phosphorus utilization efficiency and status of phosphorus reuse in China from 1990 to 2019**

Contents

Contents ..... 1

1. Chinese phosphorus cycle model ..... 2

2. Calculation of pollutant emissions from aquaculture. .... 15

3. P resource efficiency ..... 16

4. The proportion of countries importing and exporting Chinese phosphate chemical products ..... 18

5. Uncertainty analysis ..... 19

# 1. Chinese phosphorus cycle model

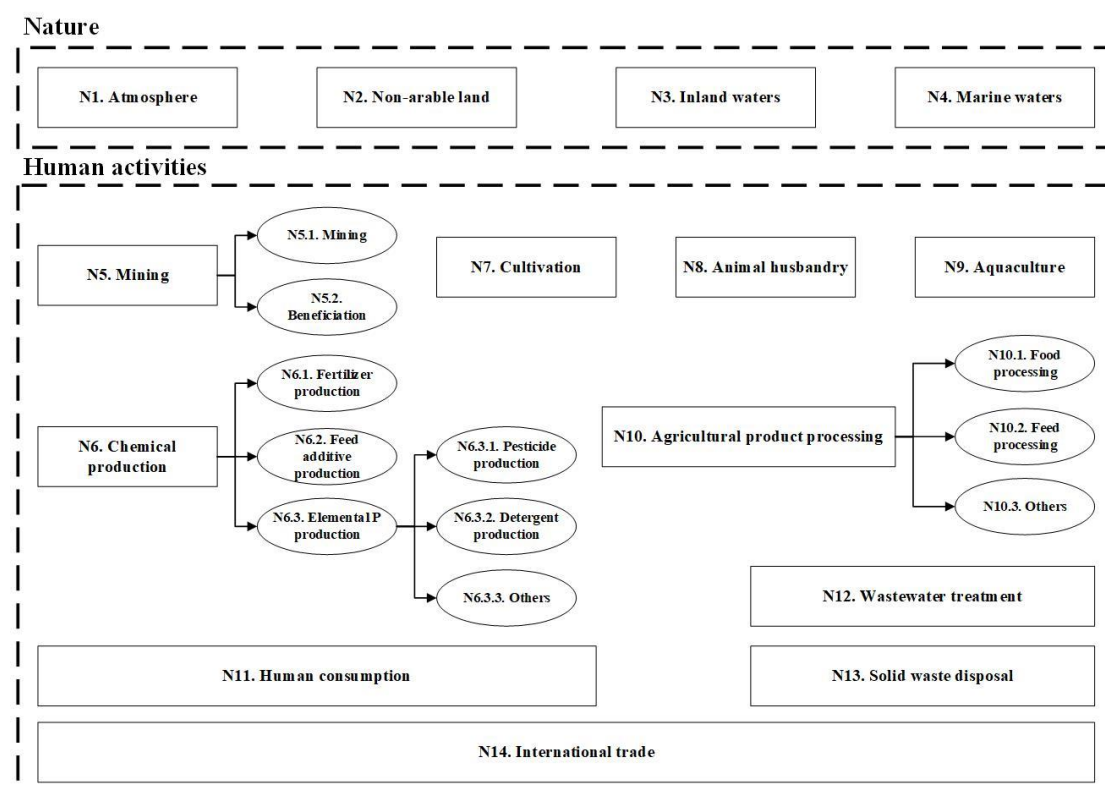

**Figure S1.** Chinese phosphorus cycle model framework.

This study was based on the China Phosphorus Cycle Model developed by Liu et al., (2016) which was divided into two parts: natural activities and human activities, with a total of fourteen modules. The natural cycle includes the atmosphere (N1), non-arable land (N2), inland water systems (N3), and marine systems (N4); human activities include mining (N5), chemical production (N6), cultivation (N7), animal husbandry (N8), aquaculture (N9), agricultural product processing (N10), human consumption (N11), wastewater treatment (N12), solid waste disposal (N13), and international trade (N14). The detailed contents of each module are shown in Figure S1. The model follows the law of conservation of mass and is based on the MFA method:  $\text{inflow} = \text{outflow} + \text{inventory change}$ . All phosphorus flow calculation formulas are divided into three categories: 1) the independent calculation, which is derived by multiplying activity data with relevant coefficients; 2) the non-independent calculation, which is derived by deduction of other phosphorus flow results; 3) the system balance, which is deduced by known phosphorus flow in the system. All activity data and explanations are given in Table S1, and all parameter data and explanations are given in Table S2.

## 1. Atmosphere

$$O_1 = O_{1-2}^{AD} + O_{1-3}^{AD} + O_{1-4}^{AD} + O_{1-7}^{AD} \quad (\text{Equation S. 1 – 1.})$$

Where

$$O_{1-2}^{AD} = (D^{TA} - D^{IW} - D^{AL}) \times P_1^{AD} \quad (\text{Equation S. 1 – 2.})$$

$$O_{1-3}^{AD} = D^{IW} \times P_1^{AD} \quad (\text{Equation S. 1 – 3.})$$

$$O_{1-4}^{AD} = D^{MW} \times P_2^{AD} \quad (\text{Equation S. 1 – 4.})$$

$$O_{1-7}^{AD} = D^{AL} \times P_1^{AD} \quad (\text{Equation S. 1 – 5.})$$

## 2. Non-arable land

$$O_2 = O_{2-1}^{WE} + O_{2-3}^{RL} + O_{2-5}^{PO} + O_{2-2}^{WT} + O_{2-7}^{WT} + O_{2-8}^{PS} + O_{2-10}^{WD} \quad (\text{Equation S. 2 – 1})$$

Where

$$O_{2-1}^{WE} = (D^{TA} - D^{IW} - D^{AL}) \times P^{WE} \quad (\text{Equation S. 2 – 2})$$

$$O_{2-3}^{RL} = (D^{TA} - D^{IW} - D^{AL}) \times P^{RL} \quad (\text{Equation S. 2 – 3})$$

$$O_{2-5}^{PO} = \text{Balancing}N_5 \quad (\text{Equation S. 2 – 4})$$

$$O_{2-2}^{WT} = (D^{TA} - D^{IW} - D^{AL}) \times P^{WT} \quad (\text{Equation S. 2 – 5})$$

$$O_{2-7}^{WT} = D^{AL} \times P^{WT} \quad (\text{Equation S. 2 – 6})$$

$$O_{2-8}^{PS} = \text{Balancing}N_8(\text{herbivores}) \quad (\text{Equation S. 2 – 7})$$

$$O_{2-10}^{WD} = D^{WD} \times P_1^{WD} \times P_2^{WD} \quad (\text{Equation S. 2 – 8})$$

## 3. Inland waters

$$O_3 = O_{3-4}^{RT} + O_{3-10}^{NFW} \quad (\text{Equation S. 3 – 1})$$

Where

$$O_{3-4}^{RT} = \left( \begin{array}{c} O_{1-3}^{AD} + O_{2-3}^{RL} + O_{5.2-3}^{WW,nt} + O_{6.1-3}^{WW,nt} + O_{6.2-3}^{WW,nt} + O_{6.3-3}^{WW,nt} + O_{6.3.1-3}^{WW,nt} \\ + O_{6.3.2-3}^{WW,nt} + O_{7-3}^{RF} + O_{7-3}^{LH} + O_{8-3}^{AE,nu} + O_{9-3}^{NL} + O_{10.1-3}^{WW,nt} + O_{11-3}^{WW,nt} + O_{12-3}^{EF} \end{array} \right) \times P^{RT} \quad (\text{Equation S. 3 – 2})$$

$$O_{3-10}^{NFW} = D^{NFW} \times P^{FW} \quad (\text{Equation S. 3 – 3})$$

#### 4. Marine waters

$$O_4 = O_{4-1}^{SS} + O_{4-10}^{NSW} \quad (\text{Equation S. 4 – 1})$$

Where

$$O_{4-1}^{SS} = \frac{D^{MW}}{D^{GMW}} \times P^{SS} \quad (\text{Equation S. 4 – 2})$$

$$O_{4-10}^{NSW} = D^{NSW} \times P^{SW} \quad (\text{Equation S. 4 – 3})$$

#### 5. Mining

$$O_{5.1} = O_{5.1-14}^{PR} + O_{5.1-5.2}^{PR} + O_{5.1-6}^{PR} + O_{5.1-2}^{GG} \quad (\text{Equation S. 5.1 – 1})$$

Where

$$O_{5.1-14}^{PR} = D^{PR,ne} \times P^{PR} \quad (\text{Equation S. 5.1 – 2})$$

$$O_{5.1-5.2}^{PR} = (D^{PR} - D^{PR,ne}) \times P^{PR} \times P^{BF} \quad (\text{Equation S. 5.1 – 3})$$

$$O_{5.1-6}^{PR} = (D^{PR} - D^{PR,ne}) \times P^{PR} \times (1 - P^{BF}) \quad (\text{Equation S. 5.1 – 4})$$

$$O_{5.1-2}^{GG} = D^{PR} \times P_1^{GG} \times P_2^{GG} \quad (\text{Equation S. 5.1 – 5})$$

#### 5.2. Beneficiation

$$O_{5.2} = O_{5.2-6}^{PR} + O_{5.2-2}^{TL} + O_{5.2-3}^{WW,nt} + O_{5.2-12}^{WW,ft} \quad (\text{Equation S. 5.2 – 1})$$

Where

$$O_{5.2-6}^{PR} = O_{5.1-5.2}^{PR} \times P^{CR} \quad (\text{Equation S. 5.2 – 2})$$

$$O_{5.2-3}^{WW,nt} = \frac{142}{62 \times 30\%} \times O_{5.2-6}^{PR} \times P_1^{WWG} \times (1 - P^{WW}) \quad (\text{Equation S. 5.2 – 3})$$

$$O_{5.2-12}^{WW,ft} = \frac{142}{62 \times 30\%} \times O_{5.2-6}^{PR} \times P_1^{WWG} \times P^{WW} \quad (\text{Equation S. 5.2 – 4})$$

$$O_{5.2-2}^{TL} = \text{Balancing} N_{5.2} \quad (\text{Equation S. 5.2 – 5})$$

#### 6. Chemical production

##### 6.1. Fertilizer production

$$O_{6.1} = O_{6.1-14}^{FT} + O_{6.1-7}^{FT} + O_{6.1-3}^{WW,nt} + O_{6.1-12}^{WW,ft} + O_{6.1-2}^{PG} + O_{6.1-6.3.3}^{PG} \quad (\text{Equation S. 6.1 – 1})$$

Where

$$O_{6.1-14}^{FT} = D^{FT,ne} \times P^{FT} \times \frac{62}{142} \quad (\text{Equation S. 6.1 – 2})$$

$$O_{6.1-7}^{FT} = D^{FT} \times \frac{62}{142} - D^{FT,ne} \times P^{FT} \times \frac{62}{142} \quad (\text{Equation S. 6.1 – 3})$$

$$O_{6.1-3}^{WW,nt} = D^{FT} \times \frac{P^{HFT}}{P^{FT}} \times P_2^{WWG} \times (1 - P^{WW}) \quad (\text{Equation S. 6.1 – 4})$$

$$O_{6.1-12}^{WW,ft} = D^{FT} \times \frac{P^{HFT}}{P^{FT}} \times P_2^{WWG} \times P^{WW} \quad (\text{Equation S. 6.1 – 5})$$

$$O_{6.1-2}^{PG} = D^{FT} \times \frac{P^{HFT}}{P^{FT}} \times P_1^{PG} \times P_2^{PG} \times \frac{62}{142} \times (1 - P_3^{PG}) \quad (\text{Equation S. 6.1 – 6})$$

$$O_{6.1-6.3.3}^{PG} = D^{FT} \times \frac{P^{HFT}}{P^{FT}} \times P_1^{PG} \times P_2^{PG} \times \frac{62}{142} \times P_3^{PG} \quad (\text{Equation S. 6.1 – 7})$$

## 6.2. Feed additive production

$$O_{6.2} = O_{6.2-14}^{FA} + O_{6.2-10.2}^{FA} + O_{6.2-3}^{WW,nt} + O_{6.2-12}^{WW,ft} + O_{6.2-2}^{SW} \quad (\text{Equation S. 6.2 – 1})$$

Where

$$O_{6.2-14}^{FA} = D^{FA,ne} \times P^{FA} \quad (\text{Equation S. 6.2 – 2})$$

$$O_{6.2-10.2}^{FA} = (D^{FA} - D^{FA,ne}) \times P^{FA} \quad (\text{Equation S. 6.2 – 3})$$

$$O_{6.2-3}^{WW,nt} = D^{FA} \times P_3^{WWG} \times P^{FAWW} \times \frac{62}{142} \times (1 - P^{WW}) \quad (\text{Equation S. 6.2 – 4})$$

$$O_{6.2-12}^{WW,ft} = D^{FA} \times P_3^{WWG} \times P^{FAWW} \times \frac{62}{142} \times P^{WW} \quad (\text{Equation S. 6.2 – 5})$$

$$O_{6.2-2}^{SW} = D^{FA} \times P^{SWG} \times P^{FASW} \times \frac{62}{142} \quad (\text{Equation S. 6.2 – 6})$$

## 6.3. Elemental P production

$$O_{6.3} = O_{6.3-14}^{EP} + O_{6.3-6.3.1}^{EP} + O_{6.3-6.3.2}^{EP} + O_{6.3-6.3.3}^{EP} + O_{6.3-3}^{WW,nt} + O_{6.3-12}^{WW,ft} + O_{6.3-6.3.3}^{EP} + O_{6.3-6.3.3}^{SL} + O_{6.3-2}^{SL} \quad (\text{Equation S. 6.3 – 1})$$

Where

$$O_{6.3-14}^{EP} = D^{EP,ne} \quad (\text{Equation S. 6.3 – 2})$$

$$O_{6.3-6.3.1}^{EP} = \text{Balancing}N_{6.3.1} \quad (\text{Equation S. 6.3 – 3})$$

$$O_{6.3-6.3.2}^{EP} = \text{Balancing}N_{6.3.2} \quad (\text{Equation S. 6.3 – 4})$$

$$O_{6.3-6.3.3}^{EP} = D^{EP} - O_{6.3-14}^{EP} - O_{6.3-6.3.1}^{EP} - O_{6.3-6.3.2}^{EP} \quad (\text{Equation S. 6.3 – 5})$$

$$O_{6.3-3}^{WW,nt} = D^{EP} \times P_4^{WWG} \times (1 - P^{WW}) \quad (\text{Equation S. 6.3 – 6})$$

$$O_{6.3-12}^{WW,ft} = D^{EP} \times P_4^{WWG} \times P^{WW} \quad (\text{Equation S. 6.3 – 7})$$

$$O_{6.3-6.3.3}^{FP} = D^{EP} \times P_1^{FP} \times P_2^{FP} \quad (\text{Equation S. 6.3 – 8})$$

$$O_{6.3-6.3.3}^{SL} = D^{EP} \times P_1^{SL} \times P_2^{SL} \times \frac{62}{142} \times P_3^{SL} \quad (\text{Equation S. 6.3 – 9})$$

$$O_{6.3-2}^{SL} = D^{EP} \times P_1^{SL} \times P_2^{SL} \times \frac{62}{142} \times (1 - P_3^{SL}) \quad (\text{Equation S. 6.3 – 10})$$

#### 6.3.1. Pesticide production

$$O_{6.3.1} = O_{6.3.1-14}^{OP} + O_{6.3.1-7}^{OP} + O_{6.3.1-3}^{WW,nt} + O_{6.3.1-12}^{WW,ft} \quad (\text{Equation S. 6.3.1 – 1})$$

Where

$$O_{6.3.1-14}^{OP} = D^{P,ne} \times P_1^{OP} \times P_2^{OP} \quad (\text{Equation S. 6.3.1 – 2})$$

$$O_{6.3.1-7}^{OP} = (D^P - D^{P,ne}) \times P_1^{OP} \times P_2^{OP} \quad (\text{Equation S. 6.3.1 – 3})$$

$$O_{6.3.1-3}^{WW,nt} = D^P \times P_1^{OP} \times P_5^{WWG} \times (1 - P^{WW}) \quad (\text{Equation S. 6.3.1 – 4})$$

$$O_{6.3.1-12}^{WW,ft} = D^P \times P_1^{OP} \times P_5^{WWG} \times P^{WW} \quad (\text{Equation S. 6.3.1 – 5})$$

#### 6.3.2. Detergent production

$$O_{6.3.2} = O_{6.3.2-14}^{DG} + O_{6.3.2-11}^{DG} + O_{6.3.2-3}^{WW,nt} + O_{6.3.2-12}^{WW,ft} \quad (\text{Equation S. 6.3.2 – 1})$$

Where

$$O_{6.3.2-14}^{DG} = D^{DG,ne} \times P_1^{DG} \times P_2^{DG} + D^{DG,ne} \times (1 - P_1^{DG}) \times P_3^{DG} \quad (\text{Equation S. 6.3.2 – 1})$$

$$O_{6.3.2-11}^{DG} = (D^{DG} - D^{DG,ne}) \times P_1^{DG} \times P_2^{DG} + (D^{DG} - D^{DG,ne}) \times (1 - P_1^{DG}) \times P_3^{DG} \quad (\text{Equation S. 6.3.2 – 1})$$

$$O_{6.3.2-3}^{WW,nt} = D^{DG} \times P_6^{WWG} \times (1 - P^{WW}) \quad (\text{Equation S. 6.3.2 – 1})$$

$$O_{6.3.2-12}^{WW,ft} = D^{DG} \times P_6^{WWG} \times P^{WW} \quad (\text{Equation S. 6.3.2 – 1})$$

## 7.Cultivation

$$O_7 = O_{7-14}^{RC} + O_{7-7}^{RC,sd} + O_{7-10}^{RC} + O_{7-7}^{CS,ru} + O_{7-10}^{CS,fd} + O_{7-11}^{CS,fl} + O_{7-2}^{CS,nu} + O_{7-1}^{WE} + O_{7-3}^{RF} + O_{7-3}^{LH} + \Delta S_7^{SD} \quad (\text{Equation S. 7 – 1})$$

Where

$$O_{7-14}^{RC} = D^{RC,ne} \times P^{RC} \quad (\text{Equation S. 7 – 2})$$

$$O_{7-7}^{RC,sd} = D^{SA} \times P^{SD} \times P^{RC} \quad (\text{Equation S. 7 – 3})$$

$$O_{7-10}^{RC} = D^{RC} \times P^{RC} - D^{SA} \times P^{SD} \times P^{RC} - D^{RC,ne} \times P^{RC} \quad (\text{Equation S. 7 – 4})$$

$$O_{7-7}^{CS,ru} = D^{RC} \times P_1^{CS} \times P_2^{CS} \times P_3^{CS} \quad (\text{Equation S. 7 – 5})$$

$$O_{7-10}^{CS,fd} = D^{RC} \times P_1^{CS} \times P_2^{CS} \times P_4^{CS} \quad (\text{Equation S. 7 – 6})$$

$$O_{7-11}^{CS,fl} = D^{RC} \times P_1^{CS} \times P_2^{CS} \times P_5^{CS} \quad (\text{Equation S. 7 – 7})$$

$$O_{7-2}^{CS,nu} = D^{RC} \times P_1^{CS} \times P_2^{CS} \times P_6^{CS} \quad (\text{Equation S. 7 – 8})$$

$$O_{7-1}^{WE} = D^{AL} \times P^{WE} \quad (\text{Equation S. 7 – 9})$$

$$O_{7-3}^{RF} = D^{AL} \times P^{RF} \quad (\text{Equation S. 7 – 10})$$

$$O_{7-3}^{LH} = D^{AL} \times P^{LH} \quad (\text{Equation S. 7 – 11})$$

$$\Delta S_7^{SD} = \text{Balancing} N_7 \quad (\text{Equation S. 7 – 12})$$

## 8.Animal husbandry

$$O_8 = O_{8-14}^{LA} + O_{8-10}^{LA} + O_{8-10}^{DE} + O_{8-7}^{AE,ru} + O_{8-3}^{AE,nu} + O_{8-2}^{AE,nu} + \Delta S_8^{LA} \quad (\text{Equation S. 8 – 1})$$

Where

$$O_{8-14}^{LA} = D^{LA,ne} \times P^{LA} \quad (\text{Equation S. 8 – 2})$$

$$O_{8-10}^{LA} = (D^{LA} - D^{LA,ne}) \times P^{LA} \quad (\text{Equation S. 8 – 3})$$

$$O_{8-10}^{DE} = D^{DR} \times P^{DR} + D^{EG} \times P^{EG} \quad (\text{Equation S. 8 – 4})$$

$$O_{8-7}^{AE,ru} = D^{DLA} \times P_1^{AE} \times P_2^{AE} \quad (\text{Equation S. 8 – 5})$$

$$O_{8-3}^{AE,nu} = D^{DLA} \times P_1^{AE} \times P_3^{AE} \quad (\text{Equation S. 8 – 6})$$

$$O_{8-2}^{AE,nu} = D^{DLA} \times P_1^{AE} \times P_4^{AE} \quad (\text{Equation S. 8 – 7})$$

$$\Delta S_8^{LA} = \Delta D^{LA} \times P^{LA} \quad (\text{Equation S. 8 – 8})$$

## 9. Aquaculture

$$O_9 = O_{9-14}^{CW} + O_{9-10}^{CW} + O_{9-3}^{NL} + O_{9-4}^{NL} \quad (\text{Equation S. 9 – 1})$$

Where

$$O_{9-14}^{CW} = D^{CW,ne} \times P^{FW} \quad (\text{Equation S. 9 – 2})$$

$$O_{9-10}^{CW} = D^{CFW} \times P^{FW} + D^{CSW} \times P^{SW} - D^{CW,ne} \times P^{FW} \quad (\text{Equation S. 9 – 3})$$

$$O_{9-3}^{NL} = \text{Refer to Part Two: Calculation of pollutant emissions from aquaculture} \quad (\text{Equation S. 9 – 4})$$

$$O_{9-4}^{NL} = \text{Refer to Part Two: Calculation of pollutant emissions from aquaculture} \quad (\text{Equation S. 9 – 5})$$

## 10. Agricultural product processing

### 10.1. Food processing

$$O_{10.1} = O_{10.1-14}^{PF} + O_{10.1-11}^{PF} + O_{10.1-10.2}^{PF} + O_{10.1-7}^{BP} + O_{10.1-10.2}^{BP} + O_{10.1-10.3}^{BP} \\ + O_{10.1-3}^{WW,nt} + O_{10.1-12}^{WW,ft} + O_{10.1-13}^{SW} \quad (\text{Equation S. 10.1 – 1})$$

Where

$$O_{10.1-14}^{PF} = (D^{RI,ne} + D^{FL,ne}) \times P^{RC} + D^{PO,ne} \times P_1^{PO} + D^{SU,ne} \times P^{SU} \\ + D^{MT,ne} \times P_1^{MT} + D^{DR,ne} \times P^{DR} + D^{EG,ne} \times P^{EG} \quad (\text{Equation S. 10.1 – 2})$$

$$O_{10.1-11}^{PF} = O_{10.1-11}^{PF,grains} + O_{10.1-11}^{PF,oil} + O_{10.1-11}^{PF,oil crops} + O_{10.1-11}^{PF,sugar} + O_{10.1-11}^{PF,meat} \\ + O_{10.1-11}^{PF,dairy and egg} + O_{10.1-11}^{PF,other} \quad (\text{Equation S. 10.1 – 3})$$

$$O_{10.1-11}^{PF,grains} = O_{7-10}^{RC,rice} \times P_1^{RI} + O_{7-10}^{RC,wheat} \times P_1^{WH} + O_{7-10}^{RC,maize} + O_{7-10}^{RC,millet} + O_{7-10}^{RC,sorghum} \\ + O_{7-10}^{RC,tubers} + O_{7-10}^{RC,beans} \times (1 - P_2^{PO}) - (D^{RI,ne} + D^{FL,ne}) \times P^{RC} \\ - O_{10.1-10.2}^{PF,grains} \quad (\text{Equation S. 10 – 4})$$

$$O_{10.1-11}^{PF,oil} = \frac{O_{7-10}^{RC,oil crops}}{P^{RC}} \times P_1^{PO} \times P_2^{PO} \times P_3^{PO} - D^{PO,ne} \times P_1^{PO} \quad (\text{Equation S. 10.1 – 5})$$

$$O_{10.1-11}^{PF,oil crops} = O_{7-10}^{RC,oil crops} \times (1 - P_2^{PO}) \quad (\text{Equation S. 10.1 – 6})$$

$$O_{10.1-11}^{PF,sugar} = (D^{SU} - D^{SU,ne}) \times P^{SU} \quad (\text{Equation S. 10.1 – 7})$$

$$O_{10.1-11}^{PF,meat} = D^{MT} \times (1 - P_2^{MT}) \times P_1^{MT} - D^{MT,ne} \times P_1^{MT} \quad (\text{Equation S. 10.1 – 8})$$

$$O_{10.1-11}^{PF,dairy and egg} = O_{8-10}^{DE} - D^{DE,ne} \times P^{DR} - D^{EG,ne} \times P^{EG} \quad (\text{Equation S. 10.1 – 9})$$

$$O_{10.1-11}^{PF,other} = O_{7-10}^{RC,vegetable} + O_{3-10}^{NFW} + O_{4-10}^{NSW} + O_{9-10}^{CW} \quad (\text{Equation S. 10.1 – 10})$$



$$O_{10.1-10.2}^{PF,grains} = \text{Balancing}N_{10.2} \quad (\text{Equation S. 10.1 – 11})$$

$$O_{10.1-7}^{BP} = O_{7-10}^{RC,rice} \times P_2^{RI} \quad (\text{Equation S. 10.1 – 12})$$

$$O_{10.1-10.2}^{BP} = O_{10.1-10.2}^{BP,rice\ bran} + O_{10.1-10.2}^{BP,wheat\ bran} + O_{10.1-10.2}^{BP,oil\ meal} + O_{10.1-10.2}^{BP,bone} \quad (\text{Equation S. 10.1 – 13})$$

$$O_{10.1-10.2}^{BP,rice\ bran} = O_{7-10}^{RC,rice} \times P_3^{RI} \quad (\text{Equation S. 10.1 – 14})$$

$$O_{10.1-10.2}^{BP,wheat\ bran} = O_{7-10}^{RC,wheat} \times (1 - P_1^{WH}) \quad (\text{Equation S. 10.1 – 15})$$

$$O_{10.1-10.2}^{BP,oil\ meal} = O_{7-10}^{RC,oil\ crops} \times P_2^{PO} - \frac{O_{7-10}^{RC,oil\ crops}}{p_{RC}} \times P_1^{PO} \times P_2^{PO} \times P_3^{PO} - \frac{O_{7-10}^{RC,oil\ crops}}{p_{RC}} \times P_2^{PO} \times P_7^{WWG} \quad (\text{Equation S. 10.1 – 16})$$

$$O_{10.1-10.2}^{BP,bone} = O_{8-10}^{LA} \times P_3^{MT} - D^{MT} \times (1 - P_2^{MT}) \times P_1^{MT} \quad (\text{Equation S. 10.1 – 17})$$

$$O_{10.1-10.3}^{BP} = O_{7-10}^{RC,sugarcane} + O_{7-10}^{RC,sugar\ beet} - D^{SU} \times P^{SU} \quad (\text{Equation S. 10.1 – 18})$$

$$O_{10.1-3}^{WW,nt} = O_{10.1-3}^{WW,oil} + O_{10.1-3}^{WW,meat} \quad (\text{Equation S. 10.1 – 19})$$

$$O_{10.1-3}^{WW,oil} = \frac{O_{7-10}^{RC,oil\ crops}}{p_{RC}} \times P_2^{PO} \times P_7^{WWG} \times (1 - p^{WW}) \quad (\text{Equation S. 10.1 – 20})$$

$$O_{10.1-3}^{WW,meat} = (D^{LA} - D^{LA,ne}) \times P_8^{WWG} \times (1 - p^{WW}) \quad (\text{Equation S. 10.1 – 21})$$

$$O_{10.1-12}^{WW,ft} = O_{10.1-12}^{WW,oil} + O_{10.1-12}^{WW,meat} \quad (\text{Equation S. 10.1 – 22})$$

$$O_{10.1-12}^{WW,oil} = \frac{O_{7-10}^{RC,oil\ crops}}{p_{RC}} \times P_2^{PO} \times P_7^{WWG} \times p^{WW} \quad (\text{Equation S. 10.1 – 23})$$

$$O_{10.1-12}^{WW,meat} = (D^{LA} - D^{LA,ne}) \times P_8^{WWG} \times p^{WW} \quad (\text{Equation S. 10.1 – 24})$$

$$O_{10.1-13}^{SW} = O_{8-10}^{LA} \times (1 - P_3^{MT}) - (D^{LA} - D^{LA,ne}) \times P_8^{WWG} \quad (\text{Equation S. 10.1 – 25})$$

## 10.2. Feed processing

$$O_{10.2} = O_{10.2-14}^{AF} + O_{10.2-9}^{AF} + O_{10.2-8}^{AF} \quad (\text{Equation S. 10.2 – 1})$$

Where

$$O_{10.2-14}^{AF} = D^{AF,ne} \times p^{AF} \quad (\text{Equation S. 10.2 – 2})$$

$$O_{10.2-9}^{AF} = D^{CFW} \times P_1^{FF} \times P_2^{FF} + D^{CSW} \times P_1^{SF} \times P_2^{SF} \quad (\text{Equation S. 10.2 – 3})$$

$$O_{10.2-8}^{AF} = \text{Balancing}N_8(\text{excluding herbivores}) \quad (\text{Equation S. 10.2 – 4})$$

## 10.3. Others

$$O_{10.3} = O_{10.3-11}^{NF} \quad (\text{Equation S. 10.3 – 1})$$

Where

$$O_{10.3-11}^{NF} = O_{7-10}^{RC,cotton\ fiber} + O_{7-10}^{RC,bast} + O_{7-10}^{RC,tobacco} + O_{2-10}^{WD} + O_{10.1-10.3}^{BP} \quad (\text{Equation S. 10.3} - 2)$$

## 11. Human consumption

$$O_{11} = O_{11-7}^{HE} + O_{11-2}^{HE} + O_{11-3}^{HE} + O_{11-12}^{HE} + O_{11-2}^{SW} + O_{11-13}^{SW} + O_{11-3}^{WW,nt} + O_{11-12}^{WW,ft} + \Delta S_{11}^{HM} \quad (\text{Equation S. 11} - 1)$$

Where

$$O_{11-7}^{HE} = D^{UHM} \times P_1^{UHE} \times P_2^{UHE} + D^{RHM} \times P_1^{RHE} \times P_2^{RHE} \quad (\text{Equation S. 11} - 2)$$

$$O_{11-2}^{HE} = D^{RHM} \times P_1^{RHE} \times (1 - P_2^{RHE}) \quad (\text{Equation S. 11} - 3)$$

$$O_{11-3}^{HE} = D^{UHM} \times P_1^{UHE} \times (1 - P_2^{UHE}) \times P_3^{UHE} \quad (\text{Equation S. 11} - 4)$$

$$O_{11-12}^{HE} = D^{UHM} \times P_1^{UHE} \times (1 - P_2^{UHE}) \times (1 - P_3^{UHE}) \quad (\text{Equation S. 11} - 5)$$

$$O_{11-2}^{SW} = D^{RHM} \times P_1^{RSW} \times P_2^{RSW} \quad (\text{Equation S. 11} - 6)$$

$$O_{11-13}^{SW} = D^{USW} \times P^{USW} \quad (\text{Equation S. 11} - 7)$$

$$O_{11-3}^{WW,nt} = O_{11-3}^{UWW,nt} + O_{11-3}^{RWW,nt} \quad (\text{Equation S. 11} - 8)$$

$$O_{11-3}^{UWW,nt} = D^{DW} \times \frac{D^{UHM}}{(D^{UHM} + D^{RHM})} \times P_9^{WWG} \times P_1^{UWW} \times (1 - P_2^{UWW}) \quad (\text{Equation S. 11} - 9)$$

$$O_{11-3}^{RWW,nt} = D^{DW} \times \frac{D^{RHM}}{(D^{UHM} + D^{RHM})} \times P_9^{WWG} \times P^{RWW} \quad (\text{Equation S. 11} - 10)$$

$$O_{11-12}^{WW,ft} = D^{DW} \times \frac{D^{UHM}}{(D^{UHM} + D^{RHM})} \times P_9^{WWG} \times P_1^{UWW} \times P_2^{UWW} \quad (\text{Equation S. 11} - 11)$$

$$\Delta S_{11}^{HM} = (\Delta D^{UHM} \times \Delta D^{RHM}) \times P^{HM} \quad (\text{Equation S. 11} - 12)$$

## 12. Wastewater treatment

$$O_{12} = O_{12-3}^{EF} + O_{12-7}^{SL} + O_{12-13}^{SL} \quad (\text{Equation S. 12} - 1)$$

Where

$$O_{12-3}^{EF} = O_{5.2-12}^{WW,ft} \times \frac{P_1^{WWD}}{P_1^{WWG}} + O_{6.1-12}^{WW,ft} \times \frac{P_2^{WWD}}{P_2^{WWG}} + O_{6.2-12}^{WW,ft} \times \frac{P_3^{WWD}}{P_{FAWW}} + O_{6.3-12}^{WW,ft} \times \frac{P_4^{WWD}}{P_4^{WWG}} + O_{6.3.1-12}^{WW,ft} \times \frac{P_5^{WWD}}{P_5^{WWG}} + O_{6.3.2-12}^{WW,ft} \times \frac{P_6^{WWD}}{P_6^{WWG}} + O_{10.1-12}^{WW,oil} \times \frac{P_7^{WWD}}{P_7^{WWG}} + O_{10.1-12}^{WW,meat} \times \frac{P_8^{WWD}}{P_8^{WWG}} + O_{11-12}^{WW,ft} \times (1 - P_1^{WWT}) \quad (\text{Equation S. 12} - 2)$$

$$O_{12-7}^{SL} = O_{11-12}^{WW,ft} \times P_1^{WWT} \times P_2^{WWT} \quad (\text{Equation S. 12} - 3)$$

$$\begin{aligned}
O_{12-13}^{SL} = & O_{5.2-12}^{WW,ft} \times \left(1 - \frac{P_1^{WWD}}{P_1^{WWG}}\right) + O_{6.1-12}^{WW,ft} \times \left(1 - \frac{P_2^{WWD}}{P_2^{WWG}}\right) + O_{6.2-12}^{WW,ft} \times \left(1 - \frac{P_3^{WWD}}{P_3^{FAWW}}\right) \\
& + O_{6.3-12}^{WW,ft} \times \left(1 - \frac{P_4^{WWD}}{P_4^{WWG}}\right) + O_{6.3.1-12}^{WW,ft} \times \left(1 - \frac{P_5^{WWD}}{P_5^{WWG}}\right) + O_{6.3.2-12}^{WW,ft} \times \left(1 - \frac{P_6^{WWD}}{P_6^{WWG}}\right) \\
& + O_{10.1-12}^{WW,oil} \times \left(1 - \frac{P_7^{WWD}}{P_7^{WWG}}\right) + O_{10.1-12}^{WW,meat} \times \left(1 - \frac{P_8^{WWD}}{P_8^{WWG}}\right) + O_{11-12}^{WW,ft} \times P_1^{WWT} \\
& \times (1 - P_2^{WWT})
\end{aligned}
\tag{Equation S. 12 – 4}$$

### 13. Solid waste disposal

$$O_{13} = O_{13-2}^{SW,sp} + O_{13-2}^{SW,ld} + O_{13-2}^{SW,in} + O_{13-7}^{SW,cp} \tag{Equation S. 13 – 1}$$

Where

$$O_{13-2}^{SW,sp} = (O_{10.1-13}^{SW} + O_{11-13}^{SW} + O_{12-13}^{SL}) \times (1 - P_1^{SWD}) \tag{Equation S. 13 – 2}$$

$$O_{13-2}^{SW,ld} = (O_{10.1-13}^{SW} + O_{11-13}^{SW} + O_{12-13}^{SL}) \times P_1^{SWD} \times P_2^{SWD} \tag{Equation S. 13 – 3}$$

$$O_{13-2}^{SW,in} = (O_{10.1-13}^{SW} + O_{11-13}^{SW} + O_{12-13}^{SL}) \times P_1^{SWD} \times P_3^{SWD} \tag{Equation S. 13 – 4}$$

$$O_{13-7}^{SW,cp} = (O_{10.1-13}^{SW} + O_{11-13}^{SW} + O_{12-13}^{SL}) \times P_1^{SWD} \times P_4^{SWD} \tag{Equation S. 13 – 5}$$

**Table S1.** Activity Data

| ID      | Units           | Description                                                                                 | Source                 |
|---------|-----------------|---------------------------------------------------------------------------------------------|------------------------|
| DTA     | Mha             | Total land area of China                                                                    | NBSC,2013-2020         |
| DIW     | Mha             | Area of Chinese inland waters                                                               | NBSC,2013-2020         |
| DMW1    | Mha             | Arear of Chinese marine waters(the east China sea & South China sea)                        | NBSC,2013-2020         |
| DMW2    | Mha             | Arear of Chinese marine waters(Yellow sea & Bohai sea)                                      | NBSC,2013-2020         |
| DAL     | Mha             | The annual area of Chinese arable land                                                      | NBSC,2013-2020         |
| DWD     | Mm <sup>3</sup> | The annual wood production                                                                  | NBSC,2013-2020         |
| DRT     | Mm <sup>3</sup> | The annual sea outflow of China                                                             | MWRP,2013-2020         |
| DNFW    | Kt              | The annual production of naturally grown freshwater products                                | NBSC,2013-2020         |
| DAFW    | Kt              | The annual production of artificially cultured freshwater products                          | NBSC,2013-2020         |
| DFW1    | Kt              | Fish                                                                                        | NBSC,2013-2020         |
| DFW2    | Kt              | Shrimp and crab                                                                             | NBSC,2013-2020         |
| DFW3    | Kt              | Shellfish                                                                                   | NBSC,2013-2020         |
| DFW4    | Kt              | Others                                                                                      | NBSC,2013-2020         |
| DGMW    | Mha             | The area of global marine waters                                                            | NBSC,2013-2020         |
| DNSW    | Kt              | The annual production of naturally grown seawater products                                  | NBSC,2013-2020         |
| DASW    | Kt              | The annual production of artificially cultured seawater products                            | NBSC,2013-2020         |
| DSW1    | Kt              | Fish                                                                                        | NBSC,2013-2020         |
| DSW2    | Kt              | Shrimp and crab                                                                             | NBSC,2013-2020         |
| DSW3    | Kt              | Shellfish                                                                                   | NBSC,2013-2020         |
| DSW4    | Kt              | Algae                                                                                       | NBSC,2013-2020         |
| DSW5    | Kt              | Others                                                                                      | NBSC,2013-2020         |
| DPRNE   | Kt              | The annual net export of raw phosphate rocks                                                | UN Comtrade ,2013-2020 |
| DPR     | Kt              | The annual production of raw phosphate rocks(containing 30% P <sub>2</sub> O <sub>5</sub> ) | DIS,2013-2020          |
| DFTNE4  | Kt              | The annual net export of fertilizers (HS 310310)                                            | UN Comtrade,2013-2020  |
| DFTNE5  | Kt              | -HS 310390                                                                                  | UN Comtrade,2013-2020  |
| DFTNE6  | Kt              | -HS 310520                                                                                  | UN Comtrade,2013-2020  |
| DFTNE7  | Kt              | -HS 310530                                                                                  | UN Comtrade,2013-2020  |
| DFTNE8  | Kt              | -HS 310540                                                                                  | UN Comtrade,2013-2020  |
| DFTNE9  | Kt              | -HS 310551                                                                                  | UN Comtrade,2013-2020  |
| DFTNE10 | Kt              | -HS 310559                                                                                  | UN Comtrade,2013-2020  |
| DFTNE11 | Kt              | -HS 310560                                                                                  | UN Comtrade,2013-2020  |
| DFT     | Kt              | The annual production of fertilizers (expressed with 100% P <sub>2</sub> O <sub>5</sub> )   | DIS,2013-2020          |
| DFANE   | Kt              | The annual net export of feed additives (HS 283525)                                         | UN Comtrade,2013-2020  |
| DFA     | Kt              | The annual production of feed additives                                                     | CPCIF,2013-2020        |
| DEPNE   | Kt              | The annual net export of elemental P                                                        | UN Comtrade,2013-2020  |
| DEP     | Kt              | The annual production of elemental P                                                        | CPCIF,2013-2020        |
| DPNE    | Kt              | The annual net export of pesticides                                                         | CPCIF,2013-2020        |
| DP      | Kt              | The annual production of pesticides                                                         | DIS,2013-2020          |
| DDGNE1  | Kt              | The annual net export of soap and detergents (HS 3402)                                      | UN Comtrade,2013-2020  |

|         |      |                                                                                                                        |                       |
|---------|------|------------------------------------------------------------------------------------------------------------------------|-----------------------|
| DDGNE2  | Kt   | -HS 3401                                                                                                               | UN Comtrade,2013-2020 |
| DDG1    | Kt   | The annual production of detergents                                                                                    | NBSC,2013-2020        |
| DDG2    | Kt   | -Soap                                                                                                                  | CNLIC,2013-2020       |
| DRCNE1  | Kt   | The annual net export of raw crops (HS 100610)                                                                         | UN Comtrade,2013-2020 |
| DRCNE2  | Kt   | -HS 1001                                                                                                               | UN Comtrade,2013-2020 |
| DRCNE3  | Kt   | -HS 1005                                                                                                               | UN Comtrade,2013-2020 |
| DRCNE5  | Kt   | -HS 1007                                                                                                               | UN Comtrade,2013-2020 |
| DRCNE6  | Kt   | -HS 1003+1008                                                                                                          | UN Comtrade,2013-2020 |
| DRCNE7  | Kt   | -HS 1201                                                                                                               | UN Comtrade,2013-2020 |
| DRCNE8  | Kt   | -HS 0701+0714                                                                                                          | UN Comtrade,2013-2020 |
| DRCNE9  | Kt   | -HS 5201                                                                                                               | UN Comtrade,2013-2020 |
| DRCNE11 | Kt   | -HS 1202                                                                                                               | UN Comtrade,2013-2020 |
| DRCNE12 | Kt   | -HS 1205                                                                                                               | UN Comtrade,2013-2020 |
| DRCNE13 | Kt   | -HS 1207                                                                                                               | UN Comtrade,2013-2020 |
| DRCNE16 | Kt   | -HS 5303+5302                                                                                                          | UN Comtrade,2013-2020 |
| DRCNE17 | Kt   | -HS 121293                                                                                                             | UN Comtrade,2013-2020 |
| DRCNE18 | Kt   | -HS 121291                                                                                                             | UN Comtrade,2013-2020 |
| DRCNE19 | Kt   | -HS 2401                                                                                                               | UN Comtrade,2013-2020 |
| DRCNE20 | Kt   | -HS 0703+0702+0704+0705+0706+0707+0708+0709+0710+0711+0712+0713                                                        | UN Comtrade,2013-2020 |
| DRC1    | Kt   | The annual production of raw crops(rice)                                                                               | FAO,2013-2020         |
| DRC2    | Kt   | -Wheat                                                                                                                 | FAO,2013-2020         |
| DRC3    | Kt   | -Maize                                                                                                                 | FAO,2013-2020         |
| DRC4    | Kt   | -Millet                                                                                                                | FAO,2013-2020         |
| DRC5    | Kt   | -Sorghum                                                                                                               | FAO,2013-2020         |
| DRC6    | Kt   | -Other grains                                                                                                          | FAO,2013-2020         |
| DRC7    | Kt   | -Beans                                                                                                                 | FAO,2013-2020         |
| DRC8    | Kt   | -Tubers                                                                                                                | FAO,2013-2020         |
| DRC9    | Kt   | -Cotton fiber                                                                                                          | FAO,2013-2020         |
| DRC10   | Kt   | -Cotton seed                                                                                                           | FAO,2013-2020         |
| DRC11   | Kt   | -Peanut                                                                                                                | FAO,2013-2020         |
| DRC12   | Kt   | -Rape seed                                                                                                             | FAO,2013-2020         |
| DRC13   | Kt   | -Sesame                                                                                                                | FAO,2013-2020         |
| DRC14   | Kt   | -Sunflower                                                                                                             | FAO,2013-2020         |
| DRC15   | Kt   | -Other oilcrops                                                                                                        | FAO,2013-2020         |
| DRC16   | Kt   | -Bast fibers                                                                                                           | FAO,2013-2020         |
| DRC17   | Kt   | -Sugarcane                                                                                                             | FAO,2013-2020         |
| DRC18   | Kt   | -Sugar beet                                                                                                            | FAO,2013-2020         |
| DRC19   | Kt   | -Tobacco                                                                                                               | FAO,2013-2020         |
| DRC20   | Kt   | -Vegetable                                                                                                             | FAO,2013-2020         |
| DSA1    | Kha  | The annual sown areas of crops (rice)                                                                                  | FAO,2013-2020         |
| DSA2    | Kha  | -Wheat                                                                                                                 | FAO,2013-2020         |
| DSA3    | Kha  | -Maize                                                                                                                 | FAO,2013-2020         |
| DSA4    | Kha  | -Millet                                                                                                                | FAO,2013-2020         |
| DSA5    | Kha  | -Sorghum                                                                                                               | FAO,2013-2020         |
| DSA6    | Kha  | -Other grains                                                                                                          | FAO,2013-2020         |
| DSA7    | Kha  | -Beans                                                                                                                 | FAO,2013-2020         |
| DSA8    | Kha  | -Tubers                                                                                                                | FAO,2013-2020         |
| DSA9    | Kha  | -Cotton fiber                                                                                                          | FAO,2013-2020         |
| DSA10   | Kha  | -Cotton seed                                                                                                           | FAO,2013-2020         |
| DSA11   | Kha  | -Peanut                                                                                                                | FAO,2013-2020         |
| DSA12   | Kha  | -Rape seed                                                                                                             | FAO,2013-2020         |
| DLANE1  | Kcap | The annual net export of live animals (HS 0103 Swine)                                                                  | UN Comtrade,2013-2020 |
| DLANE2  | Kcap | -HS 0102 live cattle                                                                                                   | UN Comtrade,2013-2020 |
| DLANE3  | Kcap | -HS 0104 live goat                                                                                                     | UN Comtrade,2013-2020 |
| DLANE4  | Kcap | -HS 0105 live poultry                                                                                                  | UN Comtrade,2013-2020 |
| DLANE5  | Kcap | -HS 0101live house, donkey, mule                                                                                       | UN Comtrade,2013-2020 |
| DLA1    | Kcap | The annual number of live animals to be slaughtered (pig)                                                              | NBSC,2013-2020        |
| DLA2    | Kcap | -Cattle                                                                                                                | MARP,2013-2020        |
| DLA3    | Kcap | -Sheep                                                                                                                 | MARP,2013-2020        |
| DLA4    | Kcap | -poultry                                                                                                               | MARP,2013-2020        |
| DLA5    | Kcap | -horse                                                                                                                 | MARP,2013-2020        |
| DLA6    | Kcap | -donkey/ass                                                                                                            | MARP,2013-2020        |
| DLA7    | Kcap | -camel                                                                                                                 | MARP,2013-2020        |
| DLA8    | Kcap | -mule                                                                                                                  | MARP,2013-2020        |
| DLA9    | Kcap | -rabbit                                                                                                                | MARP,2013-2020        |
| DEG     | Kt   | The annual production of egg products                                                                                  | NBSC,2013-2020        |
| DDR     | Kt   | The annual production of dairy products                                                                                | NBSC,2013-2020        |
| DDLA1   | Kcap | The average dail breeding number of animals, calculated by considering the breeding cycle s of different animals (pig) | MARP,2013-2020        |
| DDLA2   | Kcap | -Cattle                                                                                                                | MARP,2013-2020        |
| DDLA3   | Kcap | -Sheep                                                                                                                 | MARP,2013-2020        |
| DDLA4   | Kcap | -Poultry                                                                                                               | MARP,2013-2020        |
| DDLA5   | Kcap | -Horse                                                                                                                 | MARP,2013-2020        |
| DDLA6   | Kcap | -Donkey/ass                                                                                                            | MARP,2013-2020        |
| DDLA7   | Kcap | -Camel                                                                                                                 | MARP,2013-2020        |
| DDLA8   | Kcap | -Mule                                                                                                                  | MARP,2013-2020        |
| DDLA9   | Kcap | -Rabbit                                                                                                                | MARP,2013-2020        |
| DEDLA1  | Kcap | The interannual change of stocks of live animals(pig)                                                                  | MARP,2013-2020        |
| DEDLA2  | Kcap | -Cattle                                                                                                                | MARP,2013-2020        |

|        |                 |                                                                     |                       |
|--------|-----------------|---------------------------------------------------------------------|-----------------------|
| DEDLA3 | Kcap            | -Sheep                                                              | MARP,2013-2020        |
| DEDLA4 | Kcap            | -Poultry                                                            | MARP,2013-2020        |
| DEDLA5 | Kcap            | -Horse                                                              | MARP,2013-2020        |
| DEDLA6 | Kcap            | -Donkey                                                             | MARP,2013-2020        |
| DEDLA7 | Kcap            | -Camel                                                              | MARP,2013-2020        |
| DEDLA8 | Kcap            | -Mule                                                               | MARP,2013-2020        |
| DEDLA9 | Kcap            | -Rabbit                                                             | MARP,2013-2020        |
| DRINE  | Kt              | The annual net export of husked/milled rice(HS 100620+10030+100640) | UN Comtrade,2013-2020 |
| DFLNE1 | Kt              | The annual export of flour(HS 1101+1102+1103+1104+1107+1108+1109)   | UN Comtrade,2013-2020 |
| DFLNE2 | Kt              | -HS 1105+1106                                                       | UN Comtrade,2013-2020 |
| DPONE1 | Kt              | The annual net export of plant oil (HS 1507)                        | UN Comtrade,2013-2020 |
| DPONE2 | Kt              | -HS 1508                                                            | UN Comtrade,2013-2020 |
| DPONE3 | Kt              | -HS 1514                                                            | UN Comtrade,2013-2020 |
| DPONE4 | Kt              | -HS 1511+1509                                                       | UN Comtrade,2013-2020 |
| DSUNE  | Kt              | The annual net export of sugar (HS 1701+1702+1703)                  | UN Comtrade,2013-2020 |
| DMTNE1 | Kt              | The annual net export of meat (HS 203 pork)                         | UN Comtrade,2013-2020 |
| DMTNE2 | Kt              | -HS 201+202 beef                                                    | UN Comtrade,2013-2020 |
| DMTNE3 | Kt              | -HS 0204 mutton                                                     | UN Comtrade,2013-2020 |
| DMTNE4 | Kt              | -HS 207 Poultry                                                     | UN Comtrade,2013-2020 |
| DMTNE5 | Kt              | -HS 0205+0208 others                                                | UN Comtrade,2013-2020 |
| DEGNE  | Kt              | The annual net export of egg                                        | UN Comtrade,2013-2020 |
| DDRNE  | Kt              | The annual net export of dairy                                      | UN Comtrade,2013-2020 |
| DSU    | Kt              | The annual production of sugar                                      | NBSC,2013-2020        |
| DMT1   | Kt              | The annual production of meat containing bones(pork)                | NBSC,2013-2020        |
| DMT2   | Kt              | -Beef                                                               | NBSC,2013-2020        |
| DMT3   | Kt              | -Mutton                                                             | NBSC,2013-2020        |
| DMT4   | Kt              | -Poultry                                                            | MARP,2013-2020        |
| DMT5   | Kt              | -Others                                                             | MARP,2013-2020        |
| DAFNE  | Kt              | The annual net export of animal feeds                               | UN Comtrade,2013-2020 |
| DUHM   | Mcap            | The number of urban population                                      | NBSC,2013-2020        |
| DRHM   | Mcap            | The number of rural population                                      | NBSC,2013-2020        |
| DDW    | Mm <sup>3</sup> | The annual volume of domestic water use                             | NBSC,2013-2020        |
| DUSW   | Mt              | The annual collected weight of urban solid waste                    | NBSC,2013-2020        |
| DEDHM  | Mcap            | The interannual change of stocks of total population                | NBSC,2013-2020        |

**Table S2.** Parameter data

|       |                   |                                                                                               | *                                                 |
|-------|-------------------|-----------------------------------------------------------------------------------------------|---------------------------------------------------|
| ID    | Units             | Description                                                                                   | Source                                            |
| PAD1  | kg/(ha*yr)        | P deposition rate on inland                                                                   | *                                                 |
| PAD2  | kg/(ha*yr)        | P deposition rate on marine waters                                                            | *                                                 |
| PWE   | kg/(ha*yr)        | the annual P loss rate by wind erosion                                                        | *                                                 |
| PRL   | kg/(ha*yr)        | the annual P leaching and runoff rate from non-arable land                                    | *                                                 |
| PWT   | kg/(ha*yr)        | the annual P weathering rate                                                                  | *                                                 |
| PWD1  | kg/m <sup>3</sup> | the average wood density                                                                      | *                                                 |
| PWD2  | %                 | the average P content in wood                                                                 | *                                                 |
| PRT   | %                 | the proportion of P contained in rivers into oceans to the total P inputs into inland waters  | *                                                 |
| PFW   | %                 | the P contents in freshwater products                                                         | *                                                 |
| PSS   | Kt                | the global P load in sea spray                                                                | *                                                 |
| PSW   | %                 | the P contents in seawater products                                                           | *                                                 |
| PPR   | %                 | the average P content in raw phosphate rocks                                                  | Zhang et al., 2020                                |
| PBF   | %                 | The beneficiation proportion of raw phosphate rocks                                           | *                                                 |
| PGG1  | %                 | the gangue generation coefficient from mining                                                 | SCP,2018                                          |
| PGG2  | %                 | the average P content in gangues                                                              | *                                                 |
| PCR   | %                 | the concentrate recovery rate of beneficiation                                                | *                                                 |
| PWWG1 | %                 | P generation coefficient in wastewater from beneficiation                                     | SCP,2018                                          |
| PWW   | %                 | the treatment proportion of industrial wastewater                                             | *                                                 |
| PFT   | %                 | the P2O5 content in fertilizers                                                               | *                                                 |
| PHFT  | %                 | the share of high-concentration P fertilizers                                                 | *                                                 |
| PWWG2 | %                 | the P generation coefficient in wastewater from fertilizer production                         | SCP,2018                                          |
| PG1   | %                 | the phosphogypsum generation coefficient in the production of highconcentration P fertilizers | SCP,2018                                          |
| PPG2  | %                 | the P2O5 content in phosphogypsum                                                             | *                                                 |
| PPG3  | %                 | the utilization rate of phosphogypsum                                                         | J. Jiang et al., 2021                             |
| PFA   | %                 | the P content in feed additives                                                               | Standardization Administration of P.R.China, 2017 |
| PWWG3 | M <sup>3</sup> /t | the wastewater generation coefficient of feed additive production                             | SCP,2018                                          |
| PFAWW | %                 | the P2O5 content in untreated wastewater from feed additive production                        | *                                                 |
| PSWG  | %                 | the solid waste generation coefficient of feed additive production                            | SCP,2018                                          |
| PFASW | %                 | the P2O5 content in solid waste from feed additive production                                 | *                                                 |
| PPF1  | %                 | the ferrophosphorus generation coefficient of elemental P production                          | SCP,2018                                          |
| PPF2  | %                 | the P content in ferrophosphorus                                                              | *                                                 |
| PSL1  | %                 | the slag generation coefficient of element P production                                       | SCP,2018                                          |
| PSL2  | %                 | the P2O5 content in slags                                                                     | *                                                 |
| PSL3  | %                 | the utilization rate of slags                                                                 | *                                                 |
| PWWG4 | %                 | the P generation coefficient in wastewater from elemental P production                        | *                                                 |
| POP1  | %                 | the share of organophosphorus pesticides                                                      | Liu et al., 2020                                  |

|       |             |                                                                                         |                                                           |
|-------|-------------|-----------------------------------------------------------------------------------------|-----------------------------------------------------------|
| POP2  | %           | the P content in organophosphorus pesticides                                            | *                                                         |
| PWWG5 | %           | the P generation coefficient in wastewater from pesticide production                    | SCP,2018                                                  |
| PDG1  | %           | the share of P-free detergents                                                          | *                                                         |
| PDG2  | %           | the P content in P-free detergents                                                      | *                                                         |
| PDG3  | %           | the P content in P-containing detergents                                                | *                                                         |
| PWWG6 | %           | the P generation coefficient in wastewater from soap and synthetic detergent production | SCP,2018                                                  |
| PRC   | %           | the P contents in crop products                                                         | *                                                         |
| PSD1  | t/ha        | the use intensity of crop seeds(rice)                                                   | NDRC,2013-2020                                            |
| PSD2  | t/ha        | the use intensity of crop seeds(wheat)                                                  | NDRC,2013-2020                                            |
| PSD3  | t/ha        | the use intensity of crop seeds(maize)                                                  | NDRC,2013-2020                                            |
| PSD4  | t/ha        | the use intensity of crop seeds(millet)                                                 | NDRC,2013-2020                                            |
| PSD5  | t/ha        | the use intensity of crop seeds(sorghum)                                                | NDRC,2013-2020                                            |
| PSD7  | t/ha        | the use intensity of crop seeds(bbeans)                                                 | NDRC,2013-2020                                            |
| PSD9  | t/ha        | the use intensity of crop seeds(cotton)                                                 | NDRC,2013-2020                                            |
| PSD11 | t/ha        | the use intensity of crop seeds(peanut)                                                 | NDRC,2013-2020                                            |
| PSD12 | t/ha        | the use intensity of crop seeds(rapeseed)                                               | NDRC,2013-2020                                            |
| PCS1  | %           | the ratio of straw to grain                                                             | *                                                         |
| PCS2  | %           | the P contents in crop straws                                                           | *                                                         |
| PCS3  | %           | the proportion of straws returned to cropland                                           | Jiang, 2017,2018                                          |
| PCS4  | %           | the proportion of straws used as feeds                                                  | Jiang, 2017,2018                                          |
| PCS5  | %           | the proportion of straws used as fuels                                                  | Jiang, 2017,2018                                          |
| PCS6  | %           | the proportion of unutilized straws                                                     | Jiang, 2017,2018                                          |
| PRF   | Kg/ha       | the P runoff coefficient in cropland                                                    | *                                                         |
| PLH   | Kg/ha       | the P leaching coefficient in cropland                                                  | *                                                         |
| PLA   | t/cap       | the P content in live animals                                                           | *                                                         |
| PDR   | %           | the P content in dairy products                                                         | *                                                         |
| PEG   | %           | the P content in egg products                                                           | *                                                         |
| PAE1  | g/(cap*day) | the P excreta coefficient of live animals                                               | Shi et al., 2021                                          |
| PAE2  | %           | the proportion of animal excreta used to cropland                                       | Shi et al., 2021                                          |
| PAE3  | %           | the proportion of animal excreta to inland waters                                       | *                                                         |
| PAE4  | %           | the proportion of animal excreta to non-arable land                                     | *                                                         |
| PFF1  | %           | the feed requirement for freshwater aquaculture                                         | *                                                         |
| PFF2  | %           | the P content in freshwater feeds                                                       | *                                                         |
| PSF1  | %           | the feed requirement for seawater aquaculture                                           | *                                                         |
| PSF2  | %           | the P content in seawater feeds                                                         | *                                                         |
| PPO1  | %           | the P content in plant oil                                                              | *                                                         |
| PPO2  | %           | the proportion of oil crops used for oil production                                     | *                                                         |
| PPO3  | %           | the yield rate of plant oil                                                             | *                                                         |
| PSU   | %           | the P content in sugar                                                                  | *                                                         |
| PMT1  | %           | the P content in meat                                                                   | *                                                         |
| PMT2  | %           | the proportion of bones in slaughtered animals                                          | *                                                         |
| PMT3  | %           | the slaughtering rate of animals                                                        | *                                                         |
| PRI1  | %           | the proportion of milled rice produced from raw rice                                    | *                                                         |
| PRI2  | %           | the proportion of rice chaff/hull produced from raw rice                                | *                                                         |
| PRI3  | %           | the proportion of rice bran produced from raw rice                                      | *                                                         |
| PWH1  | %           | the proportion of flour produced from wheat                                             | *                                                         |
| PPO3  | %           | the yield rate of plant oil                                                             | *                                                         |
| PPO2  | %           | the proportion of oil crops used for oil production                                     | *                                                         |
| PMT2  | %           | the proportion of bones in slaughtered animals                                          | *                                                         |
| PWWG7 | %           | the P generation coefficient in wastewater from oil production                          | SCP,2018                                                  |
| PWWG8 | t/cap       | the P generation coefficient in wastewater from slaughtering                            | SCP,2018                                                  |
| PAF   | %           | the P content in industrial feeds                                                       | *                                                         |
| PUHE1 | Kg/cap      | the P generation coefficient in human excreta from urban households                     | *                                                         |
| PRHE1 | Kg/cap      | the P generation coefficient in human excreta from rural households                     | *                                                         |
| PUHE2 | %           | the proportion of urban excreta returned to cropland                                    | *                                                         |
| PRHE2 | %           | the proportion of rural excreta returned to cropland                                    | *                                                         |
| PUHE3 | %           | the runoff rate of unutilized urban excreta                                             | *                                                         |
| PRSW2 | g/kg        | the P content in rural solid wastes                                                     | *                                                         |
| PWWG9 | %           | the wastewater generation rate of domestic water use                                    | *                                                         |
| PUWW1 | Mg/L        | the P concentration in untreated urban wastewater (without excreta)                     | *                                                         |
| PRWW  | Mg/l        | the P concentration in untreated rural wastewater (without excreta)                     | *                                                         |
| PUWW2 | %           | the treatment rate of urban domestic wastewater                                         | Ministry of Housing and Urban-Rural Development,2013-2020 |
| PUSW  | g/kg        | the P content in urban solid waste                                                      | *                                                         |
| PRSW1 | t/cap       | the solid waste generation coefficient of rural human consumption                       | *                                                         |
| PRSW2 | g/kg        | the P content in rural solid wastes                                                     | *                                                         |
| PHM   | Kg/cap      | the average P content in adults                                                         | *                                                         |
| PWWD1 | %           | the P discharge coefficient in beneficiation wastewater                                 | SCP,2018                                                  |
| PWWD2 | %           | the P discharge coefficient in fertilizer wastewater                                    | SCP,2018                                                  |
| PWWD3 | %           | the P content in treated feed additive wastewater                                       | SCP,2018                                                  |
| PWWD4 | %           | the P discharge coefficient in elemental P wastewater                                   | SCP,2018                                                  |
| PWWD5 | %           | the P discharge coefficient in pesticide wastewater                                     | SCP,2018                                                  |
| PWWD6 | %           | the P discharge coefficient in soap and detergent wastewater                            | SCP,2018                                                  |
| PWWD7 | %           | the P discharge coefficient in oil wastewater                                           | SCP,2018                                                  |
| PWWD8 | t/cap       | the P discharge coefficient in slaughtering wastewater                                  | SCP,2018                                                  |
| PWWT1 | %           | the P elimination rate of urban municipal wastewater treatment plant                    | *                                                         |
| PWWT2 | %           | the proportion of sludge returned to cropland                                           | *                                                         |
| PSWD1 | %           | the non-hazardous treatment rate of solid waste                                         | NBSC,2013-2020                                            |

|       |   |                                                                       |                |
|-------|---|-----------------------------------------------------------------------|----------------|
| PSWD2 | % | the landfill proportion in non-hazardous treatment of solid wastes    | NBSC,2013-2020 |
| PSWD3 | % | the incineration proportion in non-hazardous treatment of solid waste | NBSC,2013-2020 |
| PSWD4 | % | the compost proportion in non-hazardous treatment of solid waste      | NBSC,2013-2020 |

\* a represents coefficients from Liu et al (2016). without modification.

## 2. Calculation of pollutant emissions from aquaculture.

Aquaculture module phosphorus discharge A separate optimization was performed for the aquaculture module(Liu et al., 2016), resulting in a different result for aquaculture inflows to freshwater and seawater. The optimization information for this part was mainly derived from the Generation and emission coefficient manual of industrial pollution sources for the Chinese Pollution Source Census. The phosphorus is discharged into the water bodies from the aquaculture information of each province. The incorporation of pollution discharge coefficients, derived from the Handbook of Pollution Emission Coefficients of Aquaculture in China (SCC, 2007), was pivotal in capturing the regional variability of aquaculture operations across different provinces in China. At the same time, based on the aquaculture data for China's provinces in the Fishery Statistics Yearbook, the P flowing into freshwater and seawater in the model was recalculated. This method was adopted by Chinese Academy of Fishery Sciences to calculate the pollution emission coefficients of aquaculture in various provinces, which accounts for the methods the types and methods of aquaculture cultured in each province. The present study limited its analysis to data generated subsequent to the publication of the 2007 edition of the Handbook of Pollution Emission Coefficients, with subsequent calculations utilizing data from the 2018 edition of the Handbook for the years 2018 and 2019.

Chinese aquaculture industry phosphorus pollutant emissions (Equation. a)

$$\sum Pollutant\ discharge_{y,j} \tag{Equation S. a)}$$

$$PD_{y,j} = PC_{y,i,j} \times IBA_{y,j} \tag{Equation S. b)}$$

$$IBA_{y,j} = PRO_{y,j} - AF_{y,j} \tag{Equation S. c)}$$

Where y denotes the region, and in this study, we considered 31 provinces, municipalities, and autonomous regions in mainland China. i is the mean value of the emission coefficient of farming species. Freshwater

farming includes a pond, factory, net tank, and fen farming. Marine aquaculture includes pond culture, factory farming, net tank culture, raft culture, and beach culture. Considering the data availability for each culture species in each region, we choose the mean value of each geographical region.  $j$  is time. In the study, the phosphorus emission information of freshwater aquaculture and marine aquaculture in each region was calculated, which correspondingly represented the phosphorus flowing into freshwater and the phosphorus flowing into seawater; PC is the pollution coefficient; IBA is the units increased in breed aquatics; PRO is the production output; AF is the amount of fingerling;

### 3. P resource efficiency

**Table S3.** PUE of agriculture

| Subsystem                       | Output (P)                                                                                                                                                                                     | Input (P)                                                                                                                                                                                                                                            | Year       | References                  | PUE        |
|---------------------------------|------------------------------------------------------------------------------------------------------------------------------------------------------------------------------------------------|------------------------------------------------------------------------------------------------------------------------------------------------------------------------------------------------------------------------------------------------------|------------|-----------------------------|------------|
| P rock mining                   | PR production (31% $-P_2O_5$ )                                                                                                                                                                 | World PR mine production                                                                                                                                                                                                                             | 1961; 2013 | (Chen & Graedel, 2016)      | 40.4; 44.8 |
| Chemical manufacturing          | Exported P rock + chemical fertilizer P rock                                                                                                                                                   | Imported P rock + mined P rock                                                                                                                                                                                                                       | 1980-2012  | (Wu et al., 2015)           | 86-88      |
|                                 | Chemical products (fertilizer + detergent + pesticide)                                                                                                                                         | P minerals                                                                                                                                                                                                                                           | 1978-2012  | (S. Jiang & Yuan, 2015)     | 98-94      |
|                                 | P-acid + elemental P + P fertilizer + detergents + feed additives + other uses                                                                                                                 | P rock                                                                                                                                                                                                                                               | 1961; 2013 | (Chen & Graedel, 2016)      | 95.4; 86.3 |
| Crop cultivation                | Harvested grains + feed straw + industrial raw materials composed of straw                                                                                                                     | Chemical fertilizer applied to field + livestock excrement applied to fields + local pesticide applied + imported pesticide and chemical fertilizer + atmospheric deposition + irrigation + seeds + excrement from rural residents applied to fields | 1980-2012  | (Wu et al., 2015)           | 39-41      |
|                                 | Primary crop products (rice + wheat + rapeseed)                                                                                                                                                | Fertilizer + manure + straw                                                                                                                                                                                                                          | 1978-2012  | (S. Jiang & Yuan, 2015)     | 54-32      |
|                                 | Crop + crop residue                                                                                                                                                                            | Chemical fertilizer + domestic livestock manure + large-scale livestock manure + rural residents' manure + straw                                                                                                                                     | 2015       | (Wu et al., 2020)           | 5.2        |
|                                 | Crop                                                                                                                                                                                           | Fertilizer + manure                                                                                                                                                                                                                                  | 1961-2019  | (Zou et al., 2022)          | 80-50      |
|                                 | Crop + crop residues + grass + runoff + erosion + losses from leaching                                                                                                                         | Fertilizer + manure + recycled crop residues + recycled human excrement + atmospheric deposition + seeds                                                                                                                                             | 1961; 2013 | (Chen & Graedel, 2016)      | 33.6; 40.6 |
|                                 | Crop + export of crop + straw                                                                                                                                                                  | Atmospheric deposition + weathering + fertilizer + pesticides + sludge + compost                                                                                                                                                                     | 1990-2019  | This study                  | 62-71      |
|                                 | Crop + plant + crop export + pasture grazing + harvested pasture + other                                                                                                                       | Mineral fertilizer + livestock manure + organic fertilizer + recycled biosolids + atmospheric deposition + seeds + others                                                                                                                            | 2005-2020  | (Chowdhury and Zhang, 2021) | 51-85      |
| Aquaculture                     | Cultured aquatic products + export of cultured aquatic products                                                                                                                                | Feed                                                                                                                                                                                                                                                 | 1990-2019  | This study                  | 8-9        |
| Agricultural product processing | Export from crop processing + grain food consumed by rural residents + grain food consumed by urban residents + residues/by-products used as fodder + residues/by-products used in other forms | Harvested grains                                                                                                                                                                                                                                     | 1980-2012  | (Wu et al., 2015)           | 96-97      |
|                                 | Crop and animal foods (manufactured rice + flour + slaughtered animal)                                                                                                                         | Fertilizer + seed + pesticide + human manure + atmosphere deposition + feed imported + fodder + food residue                                                                                                                                         | 1978-2012  | (S. Jiang & Yuan, 2015)     | 34-18      |
|                                 | Crop + meat + eggs + milk + fish + by-products to food                                                                                                                                         | Fertilizer + human waste + deposition (wet & dry) + seed + fixation + irrigation + straw + crop by-products + animal by-products + kitchen residues + other feed                                                                                     | 2013       | (Wang et al., 2018)         | 24         |
|                                 | Food + non-food + export of food +                                                                                                                                                             | Cultured aquatic products + livestock                                                                                                                                                                                                                | 1990-      | This study                  | 92-94      |



|                      |                                                                                                                                                                       |                                                                                                                                                            |            |                                  |            |
|----------------------|-----------------------------------------------------------------------------------------------------------------------------------------------------------------------|------------------------------------------------------------------------------------------------------------------------------------------------------------|------------|----------------------------------|------------|
|                      | Export of non-food + feed + export of feed                                                                                                                            | breeding + crop + straw + feed additives + wood + natural aquatic products                                                                                 | 2019       |                                  |            |
|                      | Livestock excrement applied to fields + livestock products consumed by rural residents + livestock products consumed by urban residents + livestock products exported | Feed straw + residues/by-products used as fodder + livestock bred + kitchen waste + feed from processing industry                                          | 1980-2012  | (Wu et al., 2015)                | 60-39      |
| Livestock breeding   | Pig + bovine + sheep                                                                                                                                                  | Feed + fodder + straw                                                                                                                                      | 1978-2012  | (S. Jiang & Yuan, 2015)          | 12-22      |
|                      | Livestock products + export of live animals/products                                                                                                                  | Pasture grazing + crop + pasture harvest + feed + feed additives + live animals + others                                                                   | 2005-2020  | (Biswas Chowdhury & Zhang, 2021) | 2-34       |
|                      | Eggs + dairy + export of eggs + export of dairy + livestock products + export of livestock products                                                                   | Feed + pasture                                                                                                                                             | 1990-2019  | This study                       | 14-22      |
| Rural consumption    | Excrement from rural residents applied to fields + kitchen waste                                                                                                      | Grain food consumed by rural residents + livestock products consumed by rural residents + imports for rural consumption + rural consumption of other goods | 1980-2012  | (Wu et al., 2015)                | 50-32      |
| Urban consumption    | Urban municipal wastes discharged to waste treatment                                                                                                                  | Grain food consumed by urban residents + livestock products consumed by urban residents + imports for urban consumption + urban consumption of other goods | 1980-2012  | (Wu et al., 2015)                | 4.46-40.4  |
| Societal consumption | Human excretion + other human waste                                                                                                                                   | Food                                                                                                                                                       | 1961; 2013 | (Chen & Graedel, 2016)           | 44.9; 46.7 |

**Table S4.** Precycling rate

| Subsystem                       | Definition                                                                                 |
|---------------------------------|--------------------------------------------------------------------------------------------|
| Straws as fertilizers           | The proportion of straw used as fertilizer to total wasted straw                           |
| All human activities            | The proportion of phosphorus recycling to total wasted phosphorus used in human activities |
| Agricultural planting           | The proportion of recycled phosphorus to the total                                         |
| Livestock poultry & aquaculture | inflow of phosphorus in each subsystem                                                     |

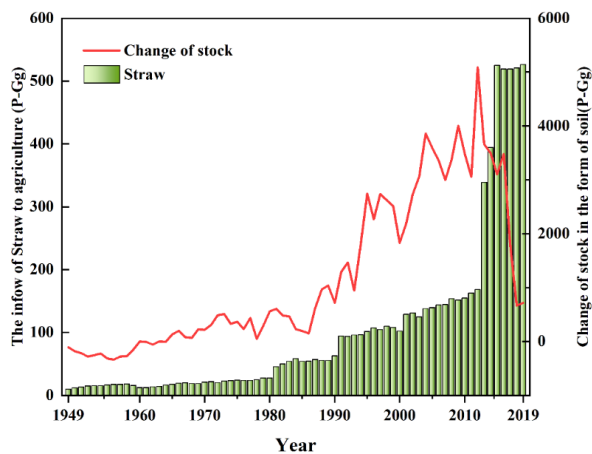

**Figure S2.** China agricultural straw mulching and inventory, 1949-2019.

#### 4. The proportion of countries importing and exporting Chinese phosphate chemical products

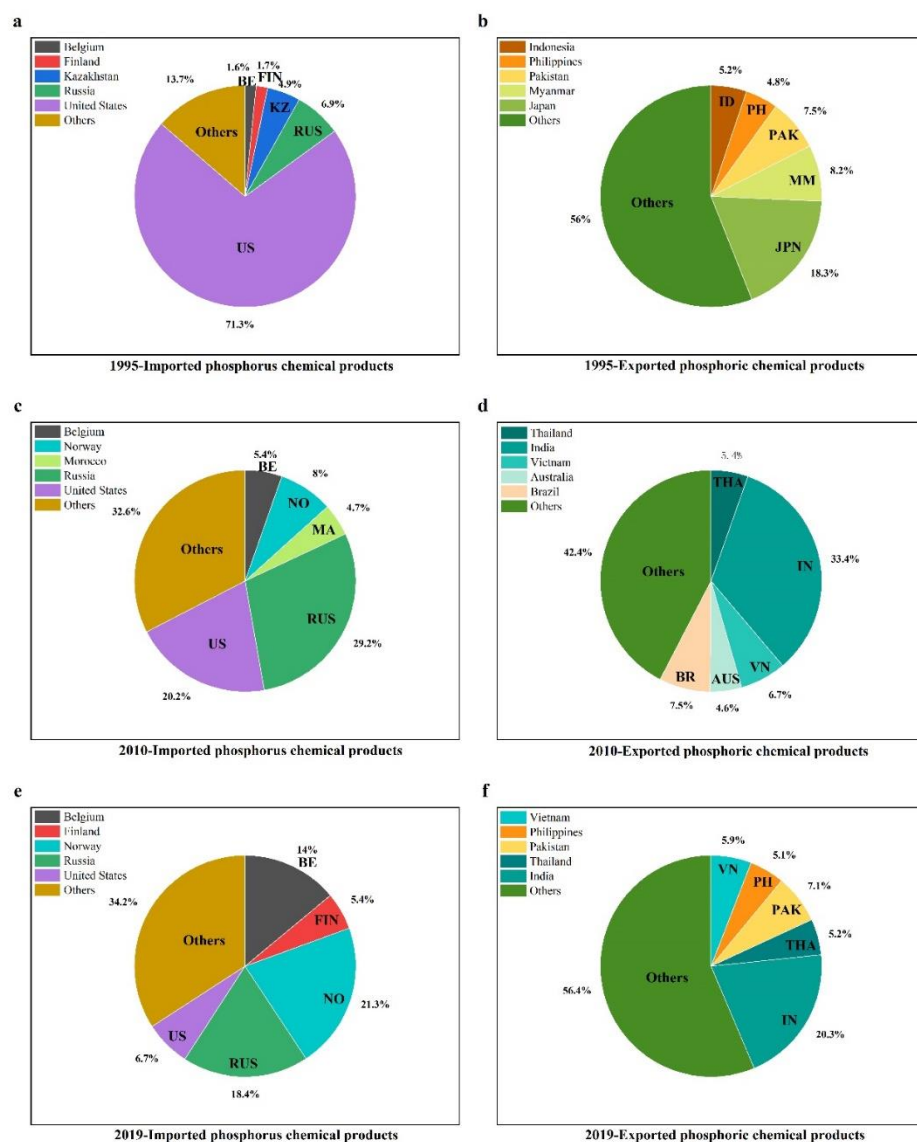

**Figure S3.** The proportion of countries importing and exporting Chinese phosphate chemical products. (a) Imported phosphorus chemical products in 1995; (b) Exported phosphorus chemical products in 1995; (c) Imported phosphorus chemical products in 1995; (d) Exported phosphorus chemical products in 2010; (e) Imported phosphorus chemical products in 1995; (f) Exported phosphorus chemical products in 2019.

## 5. Uncertainty analysis

For this study, the probability distributions of 102 phosphorus flows were calculated using Monte Carlo simulations, while the uncertainties of the activity data and parameter data and the final results were compared separately. The figure above indicates the results of the uncertainty analysis for the key phosphorus flows. In general, there exists an uncertainty objectively, but the overall results have little impact on our main study results.

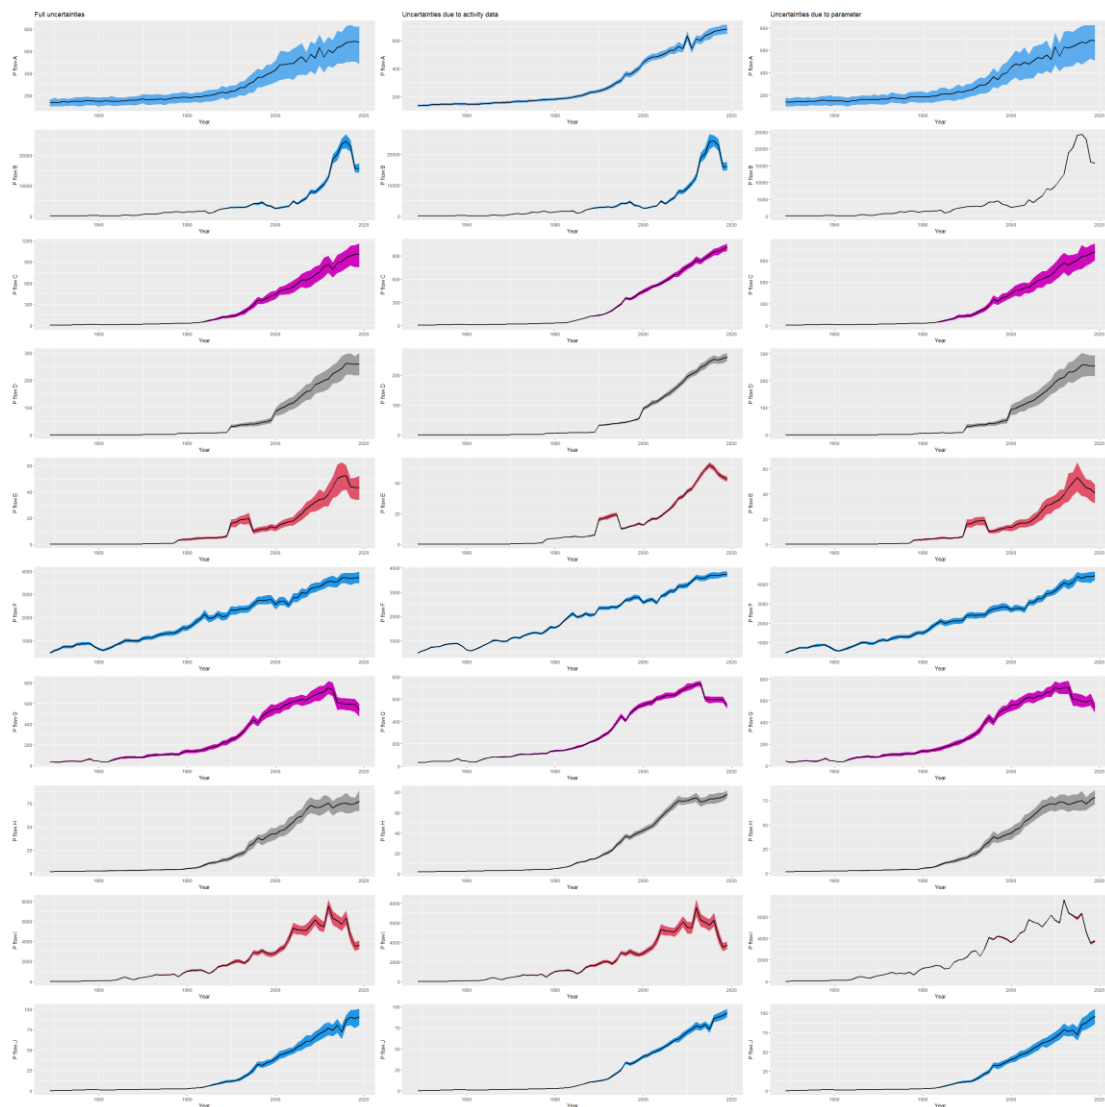

**Figure S4.** Uncertainty analysis results.
